# Supplementary material for: Saturated fatty acid attenuates anti-obesity effect of green tea
Source: PubMed Central journal article supplement (PMC6030063; doi:10.1038/s41598-018-28338-5), 2018-07-03
Supplement: 41598_2018_28338_MOESM1_ESM.pdf [file 41598_2018_28338_MOESM1_ESM.pdf]

# **Saturated fatty acid attenuates anti-obesity effect of green tea**

Shuya Yamashita<sup>1,2+</sup>, Asami Hirashima<sup>1+</sup>, I-Chian Lin<sup>1</sup>, Jaehoon Bae<sup>1</sup>, Kanami Nakahara<sup>1</sup>, Motoki Murata<sup>1</sup>, Shuhei Yamada<sup>1</sup>, Motofumi Kumazoe<sup>1</sup>, Ren Yoshitomi<sup>1</sup>, Mai Kadomatsu<sup>1</sup>, Yuka Sato<sup>1</sup>, Ayaka Nezu<sup>1</sup>, Ai Hikida<sup>1</sup>, Konatsu Fujino<sup>1</sup>, Kyosuke Murata<sup>1</sup>, Mari Maeda-Yamamoto<sup>3</sup> and Hirofumi Tachibana<sup>1,\*</sup>

<sup>1</sup> Division of Applied Biological Chemistry, Department of Bioscience and Biotechnology, Faculty of Agriculture, Kyushu University, Fukuoka 812-8581, Japan

<sup>2</sup> Institute of Fruit Tree and Tea Science, National Agriculture and Food Research Organization (NARO), Makurazaki 898-0087, Japan

<sup>3</sup> Agri-Food Business Innovation Center, National Agriculture and Food Research Organization (NARO), Tsukuba 305-8517, Japan

\* Corresponding author. E-mail: [tatibana@agr.kyushu-u.ac.jp](mailto:tatibana@agr.kyushu-u.ac.jp)

+ These authors equally contributed to this work.

**Supplementary Table S1. Composition of GTE powder used in Experiment 2**

| GTE powder (mg/g)                                         |       |
|-----------------------------------------------------------|-------|
| (-)-Epicatechin (EC)                                      | 23.3  |
| (-)-Epicatechin-3-O-gallate (ECG)                         | 32.4  |
| (-)-Epigallocatechin (EGC)                                | 69.9  |
| (-)-Epigallocatechin-3-O-gallate (EGCG)                   | 129.6 |
| (-)-Epigallocatechin-3-O-(3-O-methyl) gallate (EGCG3''Me) | 17.5  |
| (-)-Catechin (C)                                          | 8.2   |
| (-)-Catechin gallate (CG)                                 | 2.6   |
| (-)-Gallocatechin (GC)                                    | 22.0  |
| (-)-Gallocatechin-3-O-gallate (GCG)                       | 19.8  |
| (-)-Gallocatechin-3-O-(3-O-methyl) gallate (GCG3''Me)     | 3.2   |
| Total catechins                                           | 328.5 |
| Caffeine                                                  | 78.4  |

**Supplementary Table S2. Quantitative realtime PCR primers**

| Gene           | Accession No.  | Forward Primer                  | Reverse Primer                  |
|----------------|----------------|---------------------------------|---------------------------------|
| <i>Ppard</i>   | NM_011145.3    | 5'-CAGCAGACAGCCCGTTGGT-3'       | 5'-CTTTGGATGGCTCATGTCTTTGAA-3'  |
| <i>Ppara</i>   | NM_001113418.1 | 5'-CCAATGTCCTGGCCACATTTTC-3'    | 5'-GCCTGTCCTCAGGTGTGTCTGTA-3'   |
| <i>Rxra</i>    | NM_001290481.1 | 5'-ACCAATGGCTAGTCATCTGCTGTC-3'  | 5'-GTCGTCAGTGGGCAGTCTCTGTA-3'   |
| <i>Rxrb</i>    | NM_001205214.1 | 5'-ATGCGTGACATGAGGATGGA-3'      | 5'-GAAGACGTAACAGCAGCTTGG-3'     |
| <i>Ucp2</i>    | NM_011671.4    | 5'-GCAAGCATGTGTATGGCACAGTAA-3'  | 5'-AAATGTGGGCCTTCGGTCAG-3'      |
| <i>Ucp3</i>    | NM_204107.1    | 5'-CTGCACCGCCAGATGAGTTT-3'      | 5'-ATCATGGCTTGAAATCGGACC-3'     |
| <i>Sirt1</i>   | NM_019812.2    | 5'-GCAGACGTGGTAATGTCCAAACAG-3'  | 5'-ACATCTTGGCAGTATTTGTGGTGAA-3' |
| <i>Acox1</i>   | NM_015729.3    | 5'-GCTTGAAAACCACTGCCACA-3'      | 5'-CTGAGCCAGGACTATCGCATGA-3'    |
| <i>Mcad</i>    | NM_007382.4    | 5'-TGATGTGGCGGCCATTAAGA-3'      | 5'-CGGCTTCCACAATGAATCCAG-3'     |
| <i>Pgc1a</i>   | NM_008904.1    | 5'-GCGCCGTGTGATTTACGTT-3'       | 5'-CGGTAGGTGATGAAACCATAGCTG-3'  |
| <i>Rpsa</i>    | NM_011029.3    | 5'-CTGTGCCCATCCAGCAGTTC-3'      | 5'-AGCTGCTGACCAATCCTCAGTG-3'    |
| <i>Akt1</i>    | NM_001165894.1 | 5'-CATCGTGTGGCAGGATGTGTA-3'     | 5'-ACCTGGTGTGAGTCTCAGAGGTG-3'   |
| <i>Nos3</i>    | NM_008713.     | 5'-ATTCTGGCAAGACAGACTACACGA-3'  | 5'-TCCCAGTAGAGATGGTCCAG-3'      |
| <i>Gucy1a3</i> | NM_001356987.1 | 5'-AGTTCTAACCCAAGCGGTGTGAAG-3'  | 5'-GTGTACACAGGCGACACAAGTGAG-3'  |
| <i>Smpd1</i>   | NM_011421.2    | 5'-CCAGGACATTGTCTTAAGAGCTGGA-3' | 5'-AGCTAGTGGTCGGCTCAGAGTTTC-3'  |
| <i>Actb</i>    | NM_001124235.1 | 5'-CATCCGTAAAGACCTCTATGCCAA-3'  | 5'-ATGGAGCCACCGATCCACA-3'       |

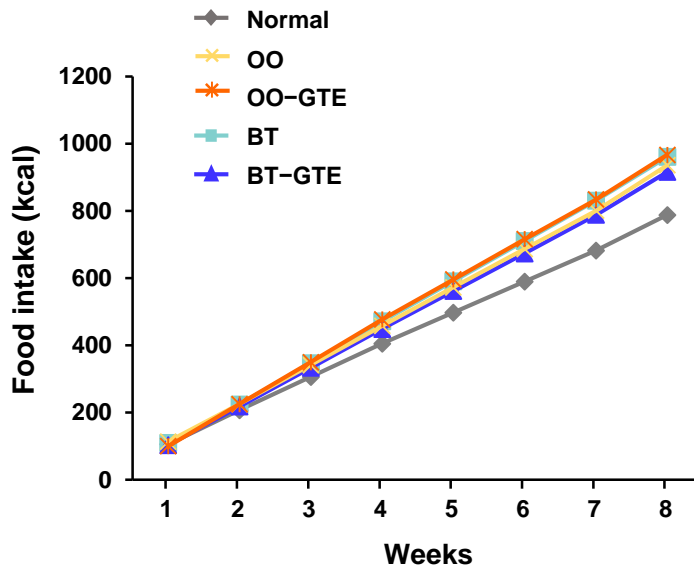

**Supplementary Figure 1. Food intake of the tested groups Experiment 1.** Food intake in mice that were fed a OO-based or BT-based HF diet (55% kcal as fat) supplemented with or without 1.0% GTE was measured on a per-cage basis throughout the study and represents cumulative energy intake.
